# Supplementary material for: Combined Simplified Molecular Classification of Gastric Adenocarcinoma, Enhanced by Lymph Node Status: An Integrative Approach
Source: MDPI journal article supplement (doi:10.3390/cancers13153722), 2021-07-24
Supplement: s1 [file s1]

**a** Oncomine Focus Assay

| Hotspots<br>in 35 genes |       |        | Copy number variants<br>in 19 genes |        | Fusion drivers<br>(23 genes) |        |
|-------------------------|-------|--------|-------------------------------------|--------|------------------------------|--------|
| AKT1                    | FGFR2 | MAP2K1 | ALK                                 | KIT    | ABL1                         | FGFR2  |
| ALK                     | FGFR3 | MAP2K2 | AR                                  | KRAS   | AKT3                         | FGFR3  |
| AR                      | GNA11 | MET    | BRAF                                | MET    | ALK                          | MET    |
| BRAF                    | GNAQ  | MTOR   | CCND1                               | MYC    | AXL                          | NTRK1  |
| CDK4                    | HRAS  | NRAS   | CDK4                                | MYCN   | BRAF                         | NTRK2  |
| CTNNB1                  | IDH1  | PDGFRA | CDK6                                | PDGFRA | EGFR                         | NTRK3  |
| DDR2                    | IDH2  | PIK3CA | EGFR                                | PIK3CA | ERBB2                        | PDGFRA |
| EGFR                    | JAK1  | RAF1   | ERBB2                               |        | ERG                          | PPARG  |
| ERBB2                   | JAK2  | RET    | FGFR1                               |        | ETV1                         | RAF1   |
| ERBB3                   | JAK3  | ROS1   | FGFR2                               |        | ETV4                         | RET    |
| ERBB4                   | KIT   | SMO    | FGFR3                               |        | ETV5                         | ROS1   |
| ESR1                    | KRAS  |        | FGFR4                               |        | FGFR1                        |        |

**b** Ion AmpliSeq Colon and Lung Cancer Research Panel v2

| Hotspots<br>in 22 genes |       |        |        |       |
|-------------------------|-------|--------|--------|-------|
| AKT1                    | EGFR  | FGFR2  | NOTCH1 | STK11 |
| ALK                     | ERBB2 | FGFR3  | NRAS   | TP53  |
| BRAF                    | ERBB4 | KRAS   | PIK3CA |       |
| CTNNB1                  | FBXW7 | MAP2K1 | PTEN   |       |
| DDR2                    | FGFR1 | MET    | SMAD4  |       |

**a** Microsatellite-unstable gastric cancer

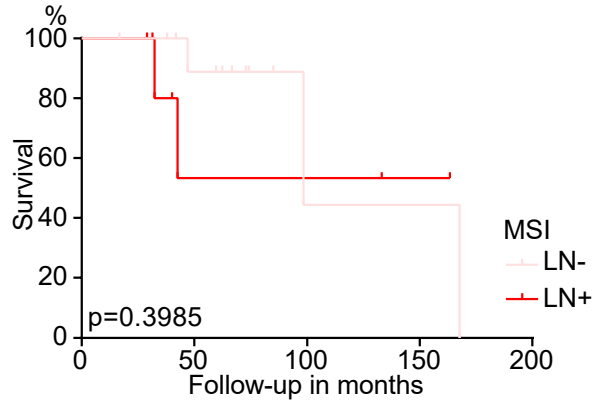

**b** Gastric cancer with wildtype p53 expression

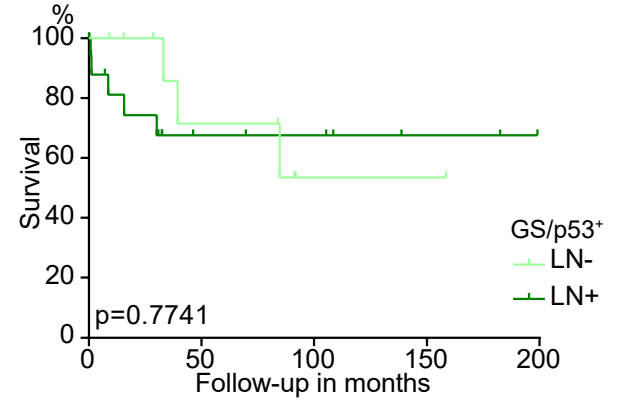

**Supplemental Table 1: Histologic findings and clinical correlations in gastric adenocarcinoma**

|                                       | EBER<br>positive |        | MLH1<br>loss |        | E-cad<br>loss |        | TP53       |       | Lymph node<br>metastases |        | <i>p value</i>      |
|---------------------------------------|------------------|--------|--------------|--------|---------------|--------|------------|-------|--------------------------|--------|---------------------|
|                                       | n                | %      | n            | %      | n             | %      | n          | %     | n                        | %      |                     |
| Total                                 | 2                | 1.7%   | 20           | 17.4%  | 10            | 8.7%   | 52         | 45.2% | 72                       | 62.6%  |                     |
| <b>Gender</b>                         |                  |        |              |        |               |        |            |       |                          |        |                     |
| male                                  | 2                | 100.0% | 10           | 50.0%  | 8             | 80.0%  | 34         | 65.4% | 46                       | 63.9%  | 0.5515              |
| female                                | 0                | 0.0%   | 10           | 50.0%  | 2             | 20.0%  | 18         | 34.6% | 26                       | 36.1%  |                     |
| <b>Age (years)</b>                    |                  |        |              |        |               |        |            |       |                          |        |                     |
| median(min-max)                       | 82 (61-91)       |        | 82 (61-91)   |        | 75 (44-81)    |        | 68 (44-89) |       | 73 (44-90)               |        | 0.0003 <sup>a</sup> |
| <b>Anatomic region</b>                |                  |        |              |        |               |        |            |       |                          |        |                     |
| GEJ                                   | 0                | 0.0%   | 1            | 5.0%   | 0             | 0.0%   | 8          | 15.4% | 6                        | 8.3%   | 0.0532              |
| Cardia                                | 1                | 50.0%  | 2            | 10.0%  | 3             | 30.0%  | 20         | 38.5% | 25                       | 34.7%  |                     |
| Corpus                                | 1                | 50.0%  | 1            | 5.0%   | 0             | 0.0%   | 10         | 19.2% | 11                       | 15.3%  |                     |
| Antrum                                | 0                | 0.0%   | 16           | 80.0%  | 7             | 70.0%  | 14         | 26.9% | 30                       | 41.7%  |                     |
| <b>Lauren classification</b>          |                  |        |              |        |               |        |            |       |                          |        |                     |
| Intestinal                            | 2                | 100.0% | 17           | 85.0%  | 0             | 0.0%   | 40         | 76.9% | 52                       | 72.2%  | 0.6876              |
| Diffuse                               | 0                | 0.0%   | 1            | 5.0%   | 2             | 20.0%  | 5          | 9.6%  | 11                       | 15.3%  |                     |
| mixed                                 | 0                | 0.0%   | 2            | 10.0%  | 8             | 80.0%  | 7          | 13.5% | 9                        | 12.5%  |                     |
| <b>WHO classification</b>             |                  |        |              |        |               |        |            |       |                          |        |                     |
| Tubular                               | 2                | 100.0% | 17           | 85.0%  | 0             | 0.0%   | 39         | 75.0% | 50                       | 69.4%  | 0.7326              |
| Papillary                             | 0                | 0.0%   | 0            | 0.0%   | 0             | 0.0%   | 0          | 0.0%  | 1                        | 1.4%   |                     |
| Mucinous                              | 0                | 0.0%   | 1            | 5.0%   | 1             | 10.0%  | 0          | 0.0%  | 2                        | 2.8%   |                     |
| Poorly cohesive                       | 0                | 0.0%   | 0            | 0.0%   | 3             | 30.0%  | 7          | 13.5% | 12                       | 16.7%  |                     |
| Mixed                                 | 0                | 0.0%   | 2            | 10.0%  | 6             | 60.0%  | 6          | 11.5% | 7                        | 9.7%   |                     |
| <b>Pathologic T</b>                   |                  |        |              |        |               |        |            |       |                          |        |                     |
| 1                                     | 0                | 0.0%   | 2            | 10.0%  | 0             | 0.0%   | 9          | 17.3% | 5                        | 6.9%   | 0.7458              |
| 2                                     | 1                | 50.0%  | 4            | 20.0%  | 1             | 10.0%  | 12         | 23.1% | 12                       | 16.7%  |                     |
| 3                                     | 0                | 0.0%   | 8            | 40.0%  | 4             | 40.0%  | 19         | 36.5% | 26                       | 36.1%  |                     |
| 4                                     | 1                | 50.0%  | 6            | 30.0%  | 5             | 50.0%  | 12         | 23.1% | 29                       | 40.3%  |                     |
| <b>Pathologic N</b>                   |                  |        |              |        |               |        |            |       |                          |        |                     |
| 0                                     | 1                | 50.0%  | 13           | 65.0%  | 3             | 30.0%  | 15         | 28.8% | 0                        | 0.0%   | <0.0001             |
| 1+                                    | 1                | 50.0%  | 7            | 35.0%  | 7             | 70.0%  | 37         | 71.2% | 72                       | 100.0% |                     |
| <b>Pathologic N according to AJCC</b> |                  |        |              |        |               |        |            |       |                          |        |                     |
| 0                                     | 1                | 50.0%  | 13           | 65.0%  | 3             | 30.0%  | 15         | 28.8% | 0                        | 0.0%   | <0.0001             |
| 1                                     | 0                | 0.0%   | 2            | 10.0%  | 0             | 0.0%   | 12         | 23.1% | 24                       | 33.3%  |                     |
| 2                                     | 0                | 0.0%   | 3            | 15.0%  | 3             | 30.0%  | 9          | 17.3% | 18                       | 25.0%  |                     |
| 3                                     | 1                | 50.0%  | 2            | 10.0%  | 4             | 40.0%  | 16         | 30.8% | 30                       | 41.7%  |                     |
| <b>Pathologic M</b>                   |                  |        |              |        |               |        |            |       |                          |        |                     |
| 0                                     | 1                | 50.0%  | 20           | 100.0% | 10            | 100.0% | 48         | 92.3% | 61                       | 84.7%  | 0.1012              |
| 1                                     | 1                | 50.0%  | 0            | 0.0%   | 0             | 0.0%   | 4          | 7.7%  | 11                       | 15.3%  |                     |
| <b>AJCC stage</b>                     |                  |        |              |        |               |        |            |       |                          |        |                     |
| 1                                     | 1                | 50%    | 5            | 25%    | 0             | 0%     | 14         | 27%   | 5                        | 7%     | 0.0138              |
| 2                                     | 0                | 0%     | 9            | 45%    | 2             | 20%    | 12         | 23%   | 16                       | 22%    |                     |
| 3                                     | 0                | 0%     | 6            | 30%    | 8             | 80%    | 22         | 42%   | 40                       | 56%    |                     |
| 4                                     | 1                | 50%    | 0            | 0%     | 0             | 0%     | 4          | 8%    | 11                       | 15%    |                     |

<sup>a</sup>one-way analysis of variance (ANOVA), for all other comparisons Chi-square test was used.

Numbers add up to more than 100% as individual patients are positive for more than one pathological or histological marker
